# Supplementary material for: ntHash: recursive nucleotide hashing
Source: PubMed Central journal article supplement — Bioinformatics. 2016 Jul 16;32(22):3492–4. doi: 10.1093/bioinformatics/btw397 (PMC5181554; doi:10.1093/bioinformatics/btw397), 2016-07-16
Supplement: supp_btw397_Mohamadi_et_al_ntHash-Supplement_revised-2IB.pdf [file supp_btw397_Mohamadi_et_al_ntHash-Supplement_revised-2IB.pdf]

## ntHash: recursive nucleotide hashing

Hamid Mohamadi, Justin Chu, Benjamin P Vandervalk, Inanc Birol

### Supplementary Data

ntHash computes the hash values for a given DNA/RNA sequence in a recursive way efficiently resulting in linear time hashing for sequences and huge improvement over the current hash methods used in genomics applications. To compute all hash values for a given DNA/RNA sequence we use:

$$H(k\text{-mer}_0) = \text{rol}^{k-1}h(r[0]) \oplus \text{rol}^{k-2}h(r[1]) \oplus \dots \oplus h(r[k-1]) \quad (1)$$

$$H(k\text{-mer}_i) = \text{rol}^1 H(k\text{-mer}_{i-1}) \oplus \text{rol}^k h(r[i-1]) \oplus h(r[i+k-1]), i=1..l-k \quad (2)$$

where *rol* is a cyclic binary left rotation,  $\oplus$  is the bit-wise exclusive or operator, and  $h(\cdot)$  is a seed table where the letters of the DNA alphabet,  $\Sigma=\{A, C, G, T\}$ , are assigned different random 64-bit integers. The related functions for the base and recursive parts of ntHash are:

```
inline uint64_t NT64(const char * kmerSeq, const unsigned k) {
    uint64_t hVal=0;
    for(unsigned i=0; i<k; i++)
        hVal ^= rol(h[(unsigned char)kmerSeq[i]], k-1-i);
    return hVal;
}
```

```
inline uint64_t NT64(const uint64_t hVal, const unsigned char charOut, const unsigned char
charIn, const unsigned k) {
    return (rol(hVal, 1) ^ rol(h[charOut], k) ^ h[charIn]);
}
```

To make hashing faster, in the implementation, we have replaced the *rol* operations with a pre-computed seed table of all possible shifts of the random 64-bit integers in *msTab*. Since there are 256 entries in the seed table and 64 possible shifts for each entry, the total size of the *msTab* is  $256 \times 64 \times 64 = 1\text{MB}$ . The corresponding functions in the ntHash library are:

```
inline uint64_t NT64(const char * kmerSeq, const unsigned k) {
    uint64_t hVal=0;
    for(unsigned i=0; i<k; i++)
        hVal ^= msTab[kmerSeq[i]][(k-1-i)%64];
    return hVal;
}
```

```
inline uint64_t NT64(const uint64_t fhVal, const unsigned char charOut, const unsigned
char charIn, const unsigned k) {
    return(rol(fhVal, 1) ^ msTab[charOut][k%64] ^ msTab[charIn][0]);
}
```

To compute the canonical hash value of a given DNA/RNA sequence, we use:

$$H(k\text{-mer}'_0) = h(r[0]+d) \oplus \text{rol}^1 h(r[1]+d) \oplus \dots \oplus \text{rol}^{k-1} h(r[k-1]+d) \quad (3)$$

$$H(k\text{-mer}'_i) = \text{ror}^1 H(k\text{-mer}'_{i-1}) \oplus \text{ror}^1 h(r[i-1]+d) \oplus \text{rol}^{k-1} h(r[i+k-1]+d), i=1..l-k \quad (4)$$

with the corresponding functions in the library:

```

inline uint64_t NTC64(const char * kmerSeq, const unsigned k, uint64_t& fhVal, uint64_t&
rhVal) {
    fhVal=0, rhVal=0;
    for(unsigned i=0; i<k; i++) {
        fhVal ^= msTab[kmerSeq[i]][(k-1-i)%64];
        rhVal ^= msTab[kmerSeq[i]+cpOff][i%64];
    }
    return (rhVal^fhVal);
}

```

```

inline uint64_t NTC64(uint64_t& fhVal, uint64_t& rhVal, const unsigned char charOut, const
unsigned char charIn, const unsigned k) {
    fhVal = rol(fhVal, 1) ^ msTab[charOut][k%64] ^ msTab[charIn][0];
    rhVal = ror(rhVal, 1) ^ msTab[charOut+cpOff][63] ^ msTab[charIn+cpOff][(k-1)%64];
    return (rhVal^fhVal);
}

```

Usually, we compute a single hash value when we hash a given  $k$ -mer. However, there are some bioinformatics applications utilizing the Bloom filter data structure that requires computing multiple hash values for a given  $k$ -mer. The existing hash methods do this by repeating the whole hashing procedure on a given  $k$ -mer with different initial seeds while in ntHahs we have provided a version to compute the multiple hash values in an efficient way. Given the number of required hash values, we first compute a hash value for the  $k$ -mer in the regular way using *NT64* function. We then perturb the 64-bit computed hash values by few additional operations without repeating the whole hashing procedure to get required number of hash values. The detailed procedure for the multi-hash version of ntHash is explained below. The uniformity results for the multi-hash version of ntHahs and other hash functions have been presented in Supp Figs. 2-5.

```

void NTM64(const char * kmerSeq, const unsigned k, const unsigned m, uint64_t *hVal) {
    uint64_t bVal=0, tVal=0;
    hVal[0] = bVal = NT64(kmerSeq, k);
    for(unsigned i=1; i<m; i++) {
        tVal = bVal * (i ^ k * multiSeed);
        tVal ^= tVal >> multiShift;
        hVal[i] = tVal;
    }
}

```

```

void NTM64(const unsigned char charOut, const unsigned char charIn, const unsigned k,
uint64_t *hVal) {
    uint64_t bVal=0, tVal=0;
    hVal[0] = bVal = rol(hVal[0], 1) ^ msTab[charOut][k%64] ^ msTab[charIn][0];
    for(unsigned i=1; i<m; i++) {
        tVal = bVal * (i ^ k * multiSeed);
        tVal ^= tVal >> multiShift;
        hVal[i] = tVal;
    }
}

```

The methods we have used in the result section are:

- cityhash: <https://github.com/google/cityhash>
- murmur: <https://github.com/appleby/smhasher>
- xxhash: <https://github.com/Cyan4973/xxHash>

The data set we have used in the result section for Fig 1.a, b, c and Supp Tables 1-4 are from:

- Real data of Human individual NA19238 from Illumina Platinum Genome project  
<http://sra.dnanexus.com/runs/ERR309932>

For the others we have used randomly generated DNA sequences using seqgen.hpp in the ntHash package.

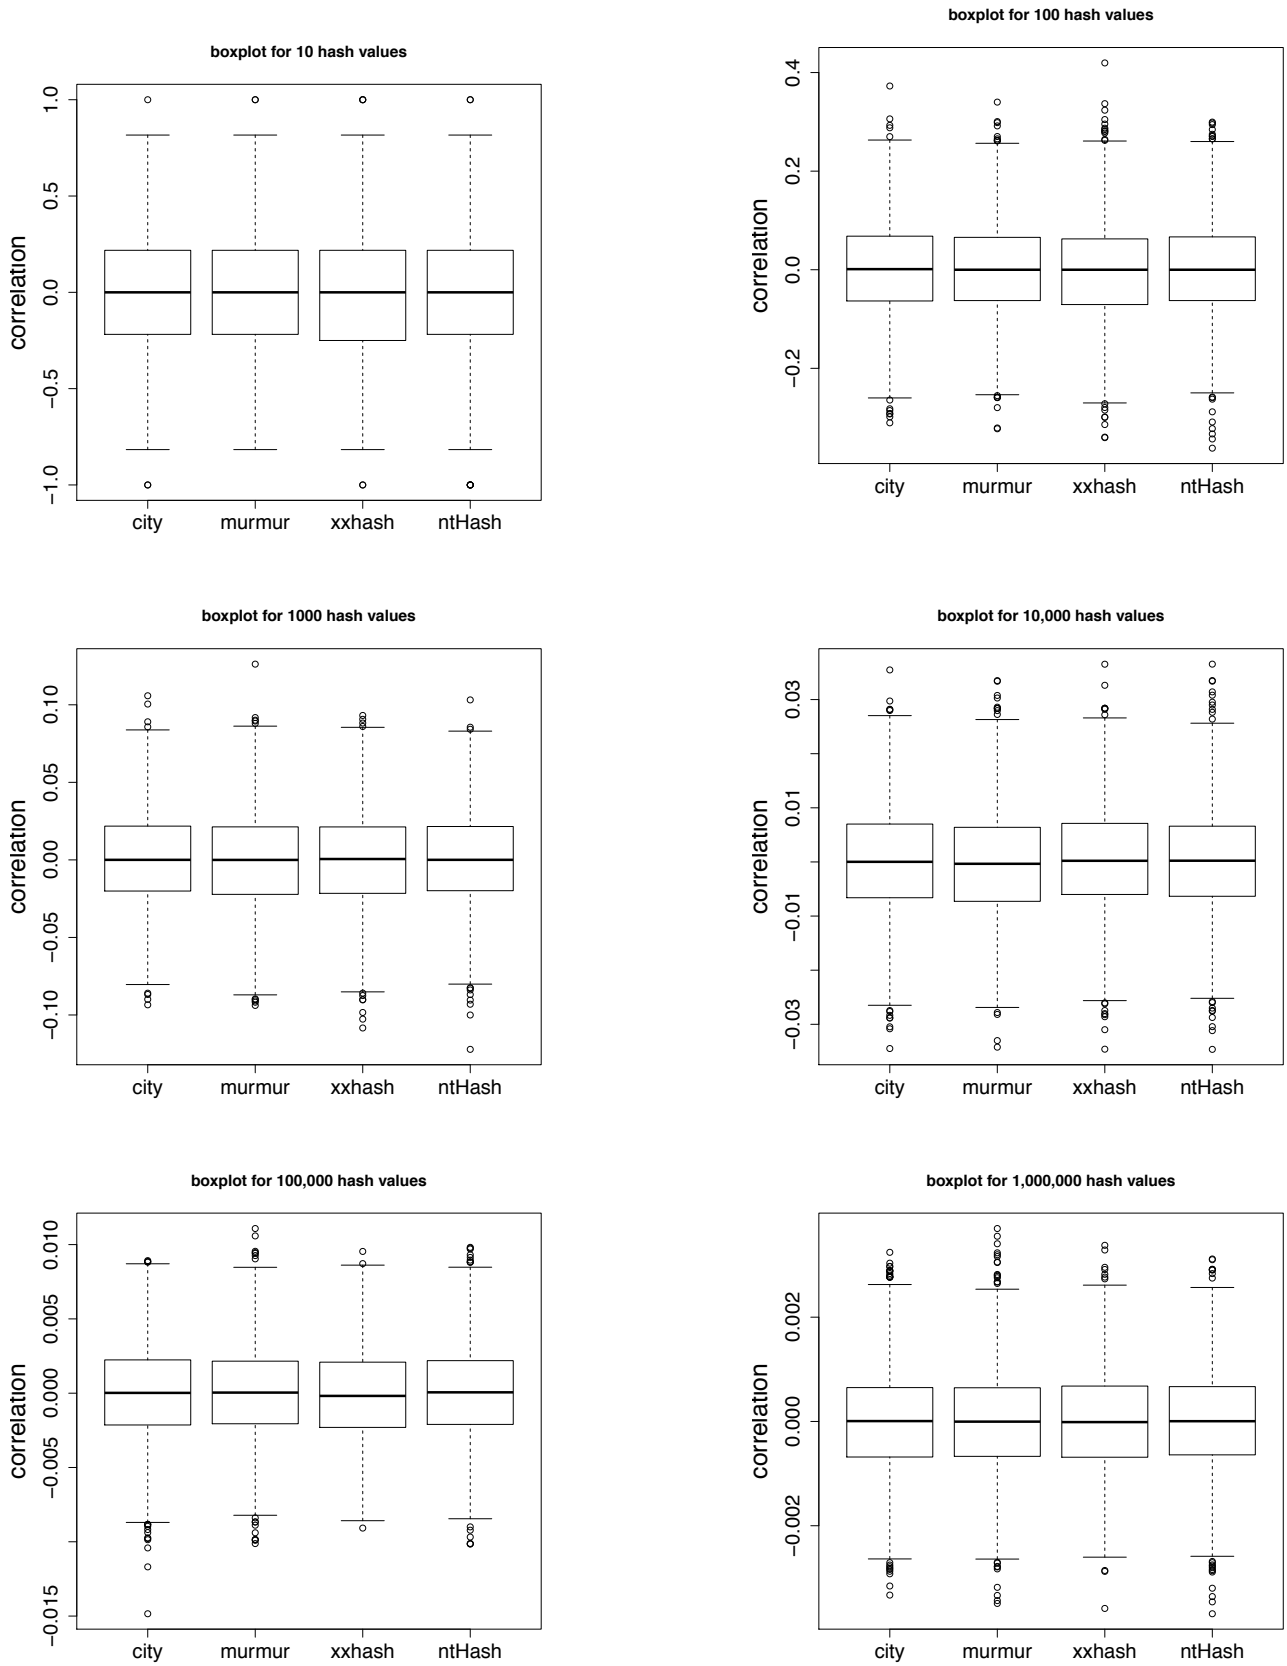

**Supp. Fig 1.** Correlation coefficient of hash algorithms for different sample sets. We see the correlation between hash value bits is near-ideal for ntHash as well as the state-of-the-art hashing methods like *cityhash*, *murmur*, and *xxhash*.

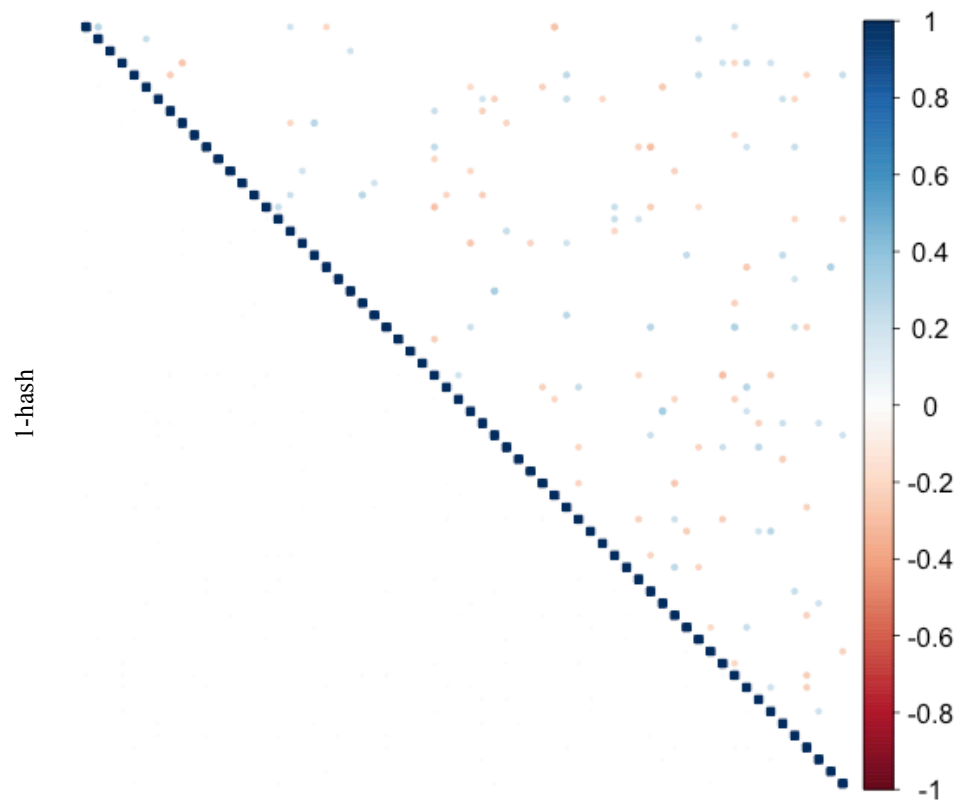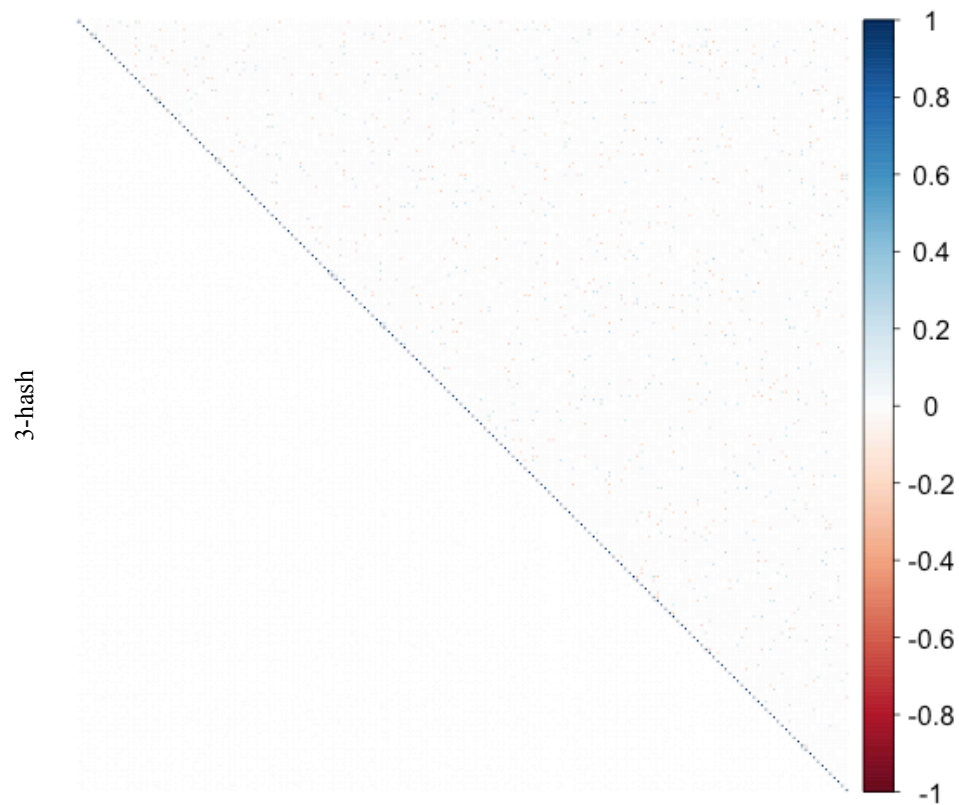

**Supp Fig 2.** Correlation coefficient plots of *cityhash* for one and three hashes on small (100 data points, the upper diagonal) and large sample set (100,000 data points, the lower diagonal).

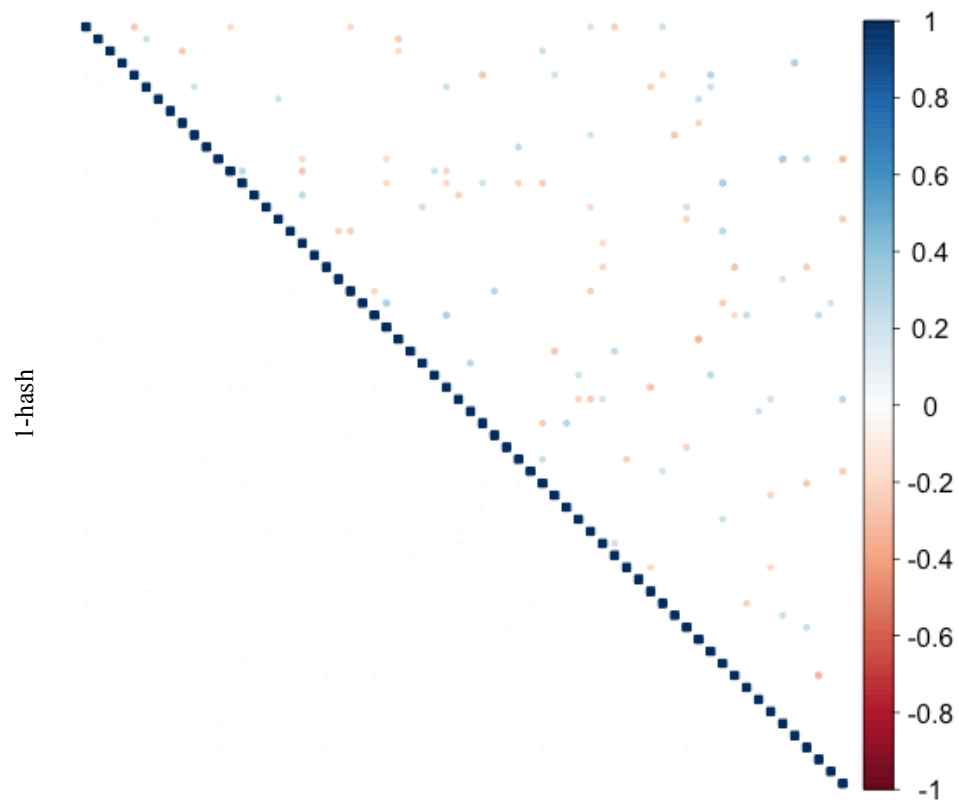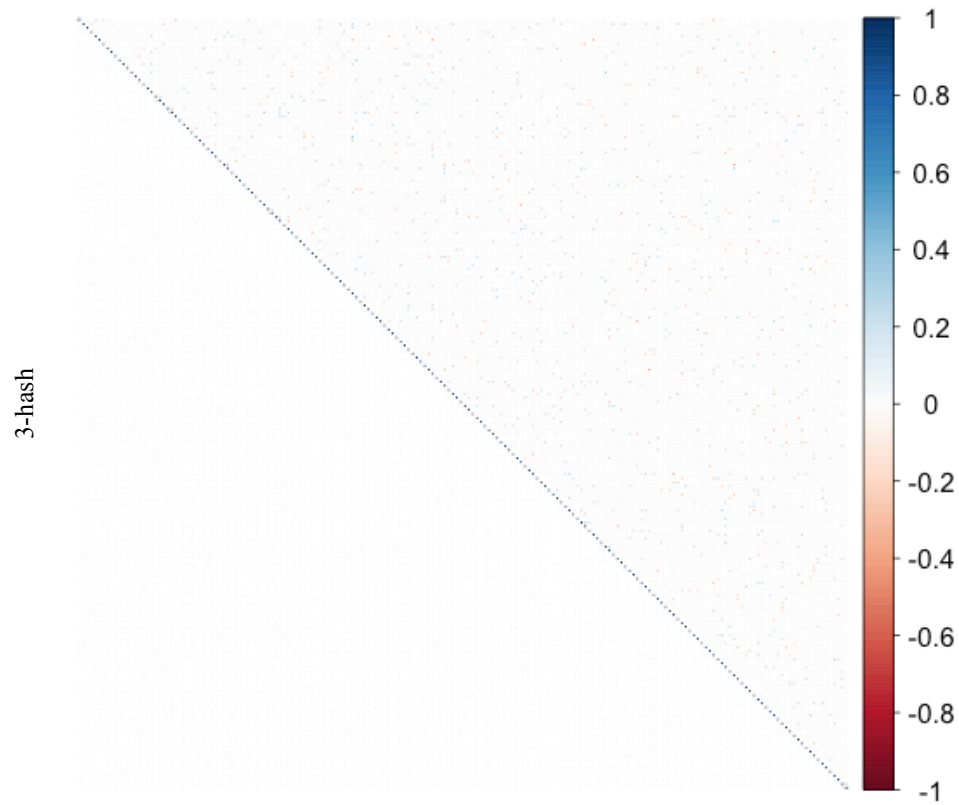

**Supp Fig 3.** Correlation coefficient plots of *murmur* for one and three hashes on small (100 data points, the upper diagonal) and large sample set (100,000 data points, the lower diagonal).

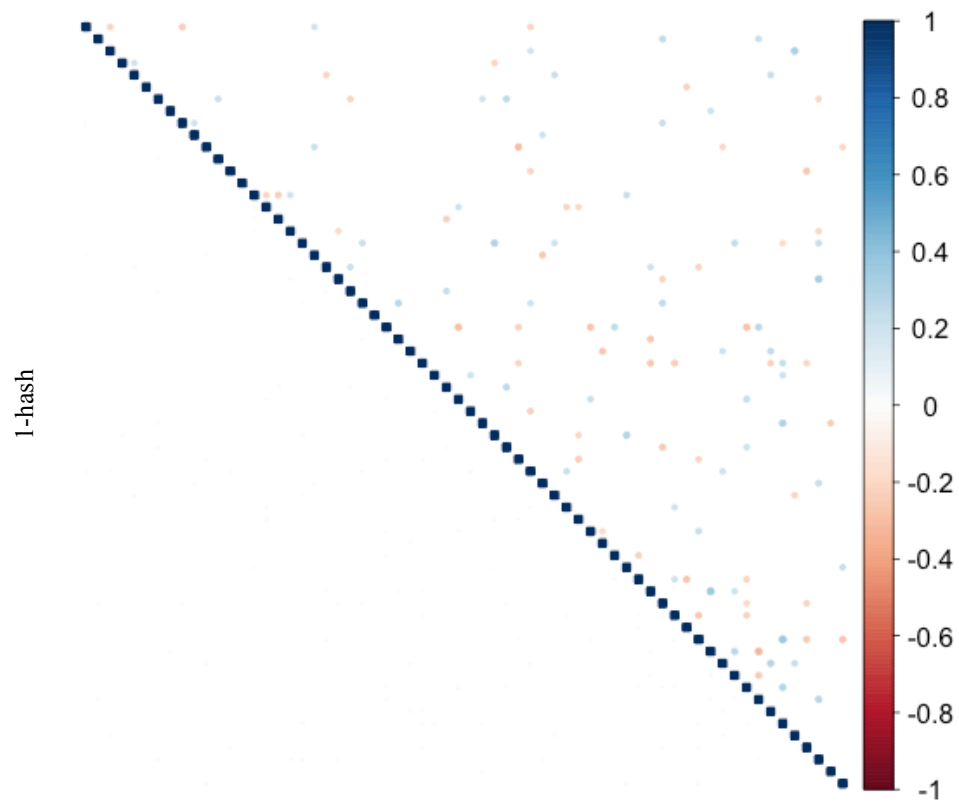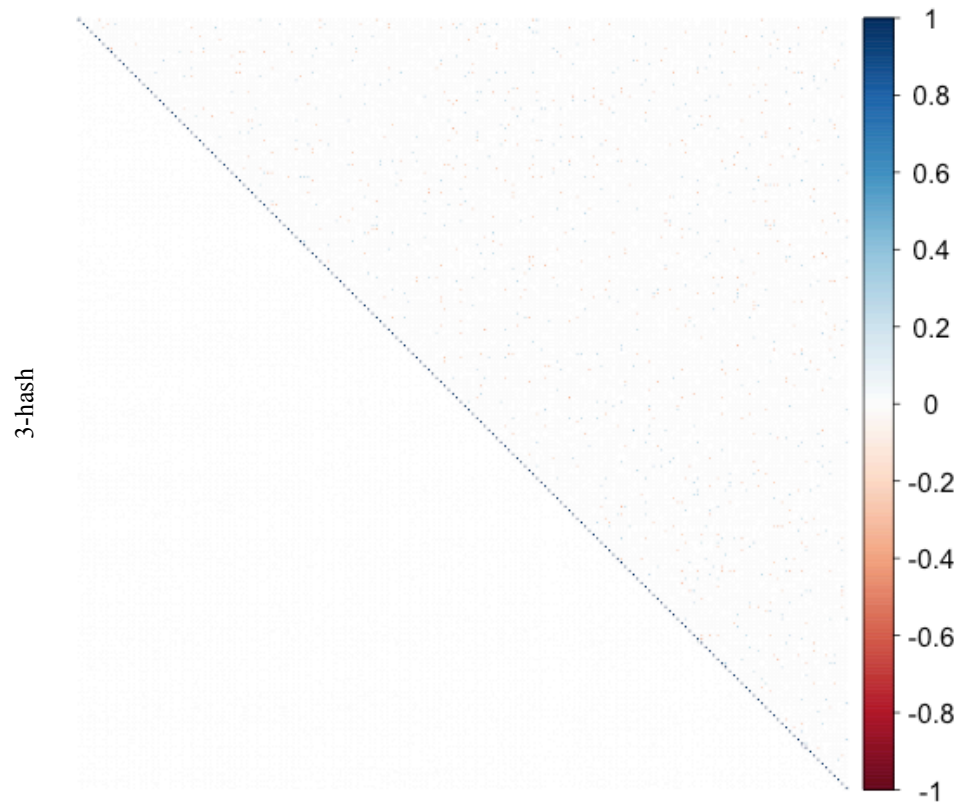

**Supp Fig 4.** Correlation coefficient plots of *xxhash* for one and three hashes on small (100 data points, the upper diagonal) and large sample set (100,000 data points, the lower diagonal).

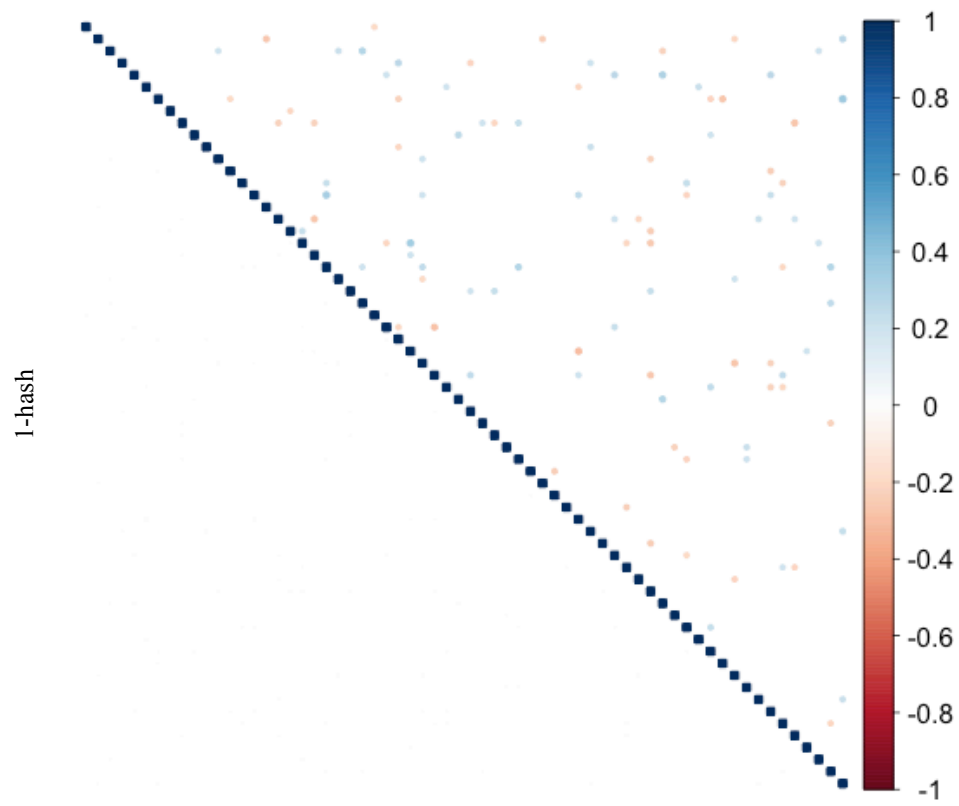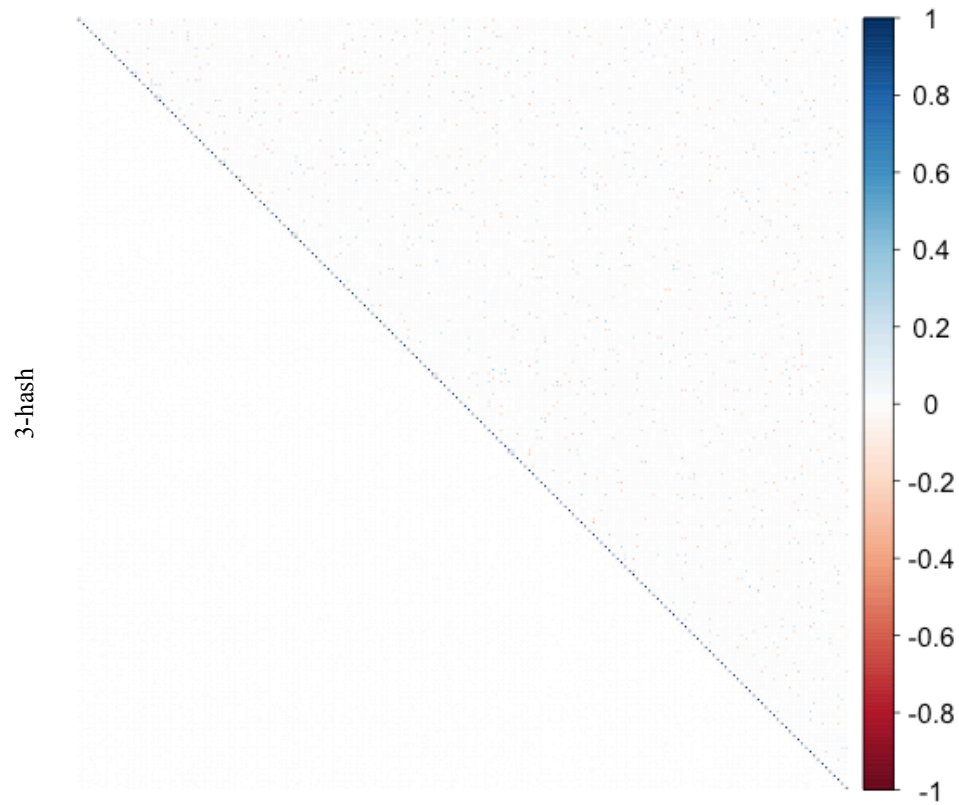

**Supp Fig 5.** Correlation coefficient plots of *ntHash* for one and three hashes on small (100 data points, the upper diagonal) and large sample set (100,000 data points, the lower diagonal).

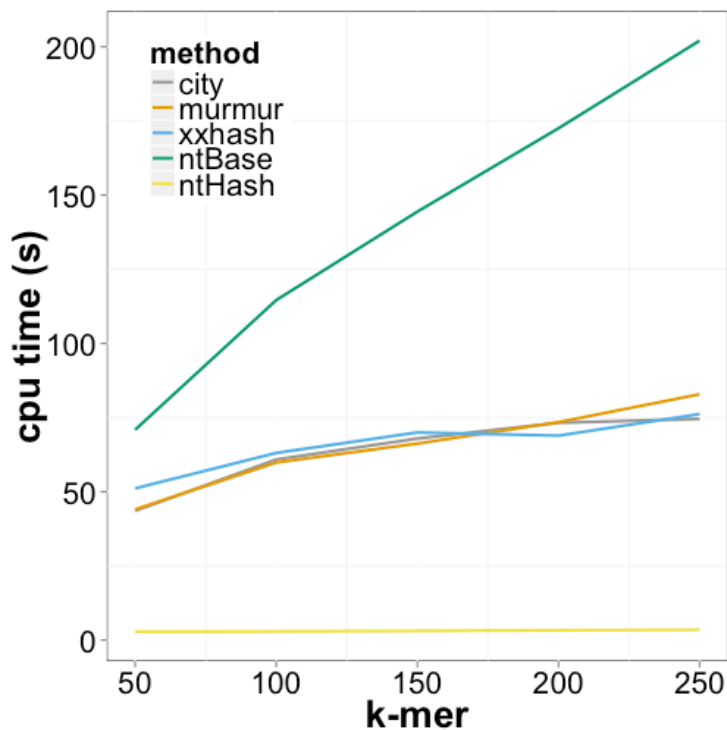

**Supp Fig 6.** CPU time for hashing 1 billion  $k$ -mers of lengths 50, 100, 150, 200, and 250. *ntBase* is the hash function based on non-recursive equation of ntHash, i.e. Equation (1).

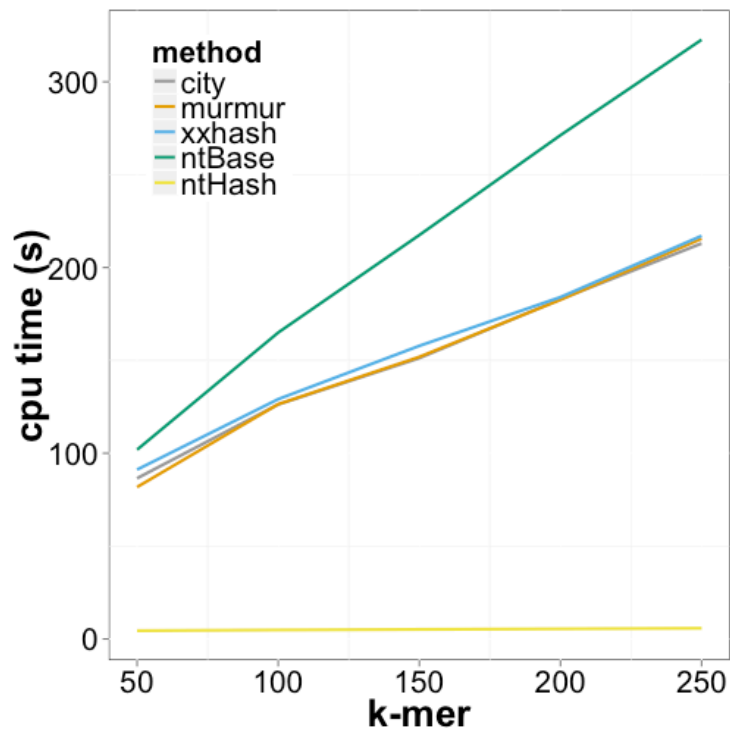

**Supp Fig 7.** CPU time for canonical hashing 1 billion  $k$ -mers of lengths 50, 100, 150, 200, and 250. *ntBase* is the hash function based on non-recursive equation of ntHash, i.e. Equation (3).



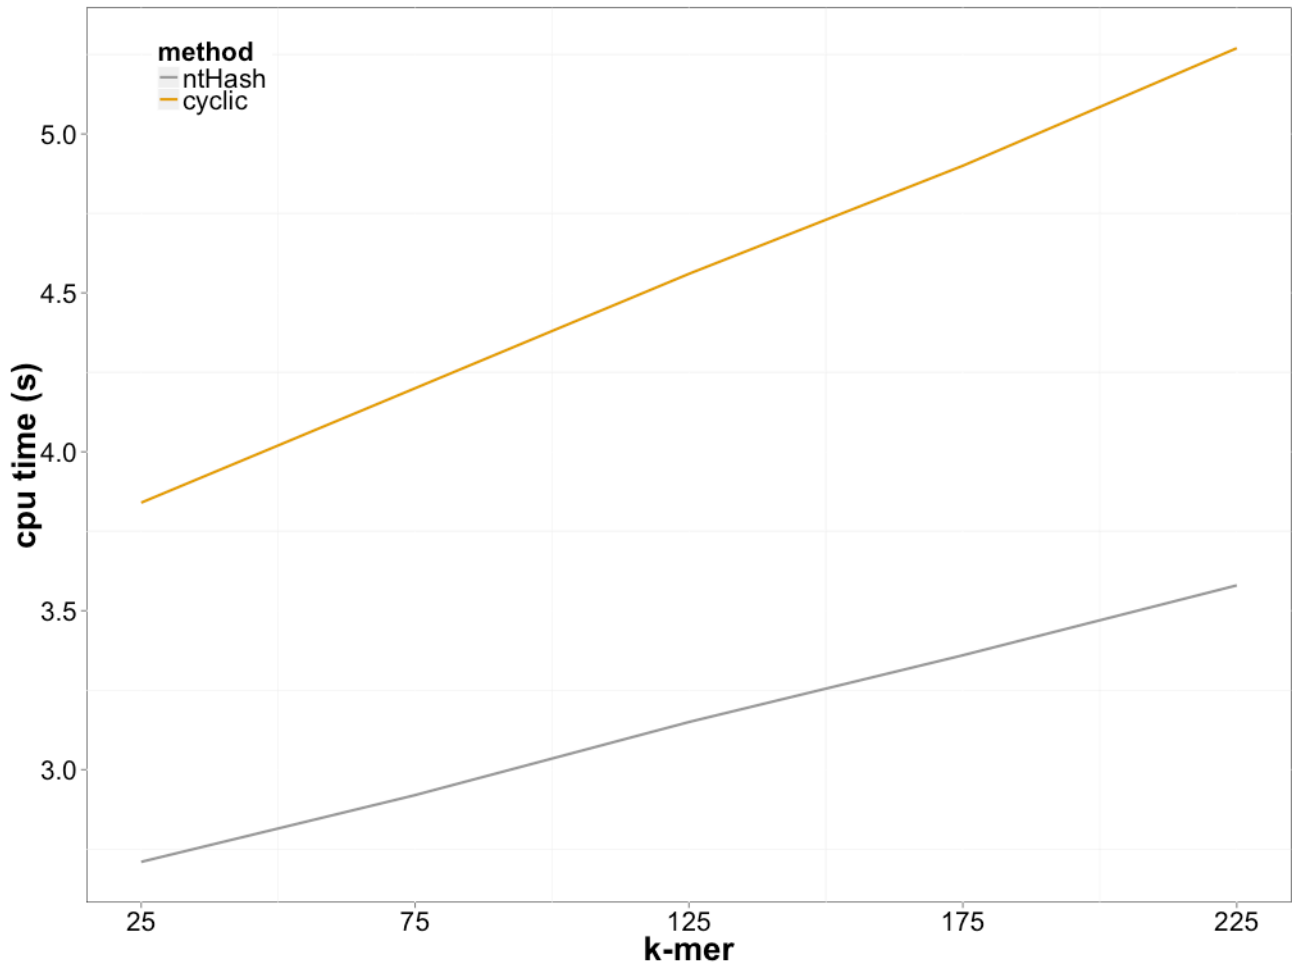

**Supp Fig 8.** CPU time for hashing 1 billion *k*-mers of lengths 25, 75, 125, 175, and 225 using *ntHash* and *CyclicHash* from <https://github.com/lemire/rollinghashcpp>.

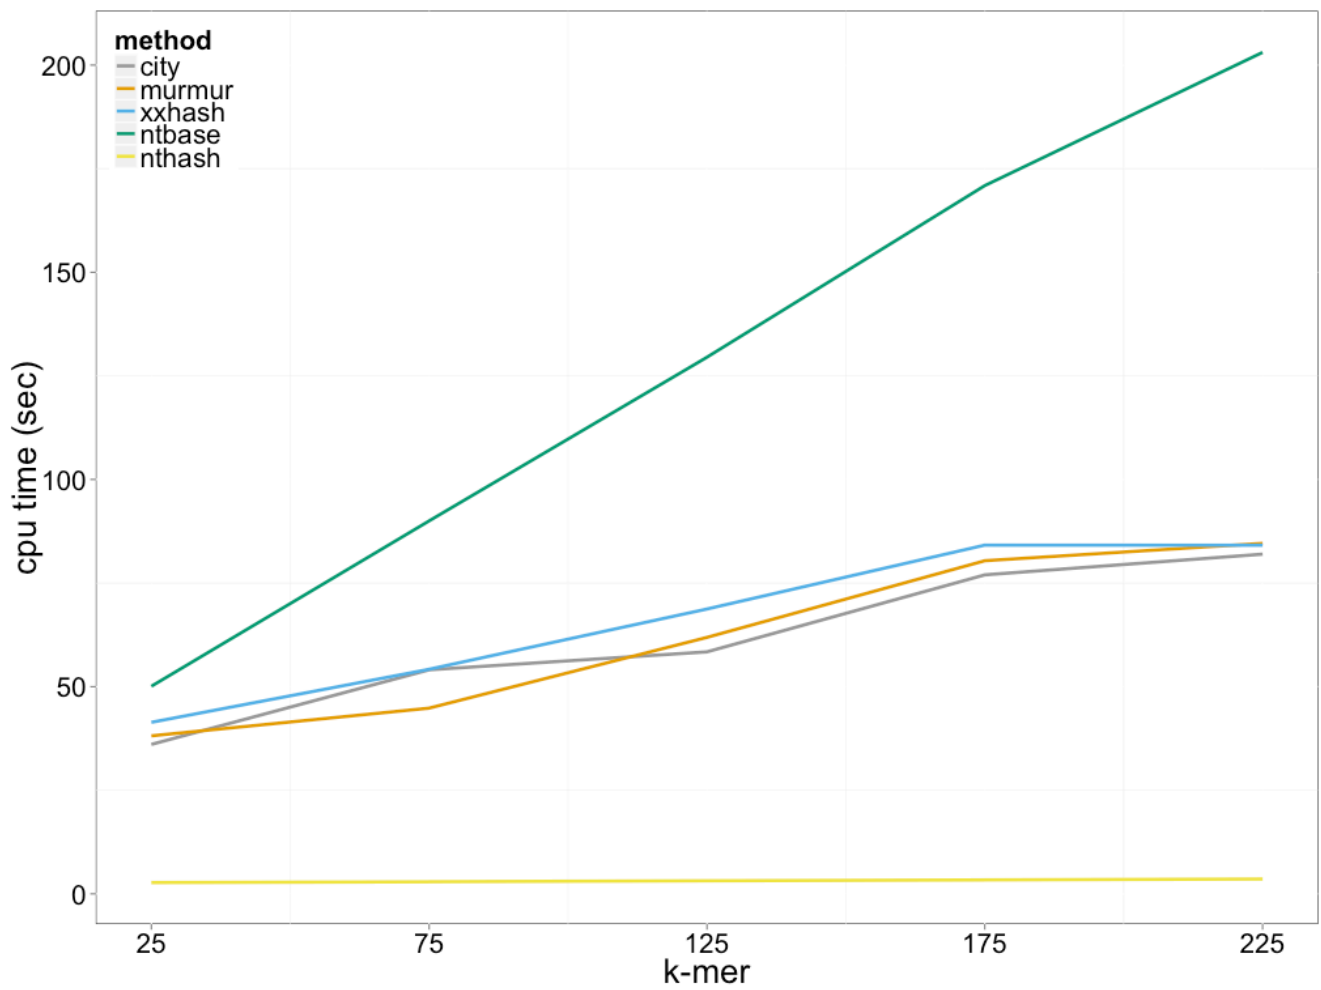

**Supp Fig 9.** CPU time for hashing 1 billion  $k$ -mers of lengths 25, 75, 125, 175, and 225. *ntBase* is the hash function based on non-recursive equation of ntHash, *i.e.* Supplementary Equation (1).

**Supp Table 1. Bloom filter evaluation for cityhash on real data \***

| k-mer         | Hash | Set bit in BF | Query     | False hit | FPR%  |
|---------------|------|---------------|-----------|-----------|-------|
| <i>k</i> =50  | 1    | 470017244     | 804000000 | 94378728  | 11.74 |
|               | 3    | 1250823778    | 804000000 | 24570368  | 3.06  |
|               | 5    | 1858906097    | 804000000 | 17400323  | 2.16  |
| <i>k</i> =150 | 1    | 469998731     | 404000000 | 47919015  | 11.86 |
|               | 3    | 1250821595    | 404000000 | 12338460  | 3.05  |
|               | 5    | 1858931600    | 404000000 | 8748217   | 2.17  |
| <i>k</i> =250 | 1    | 469986185     | 4000000   | 472181    | 11.80 |
|               | 3    | 1250802647    | 4000000   | 121776    | 3.04  |
|               | 5    | 1858880965    | 4000000   | 85939     | 2.15  |

**Supp Table 2. Bloom filter evaluation for murmur on real data \***

| k-mer         | Hash | Set bit in BF | Query     | False hit | FPR%  |
|---------------|------|---------------|-----------|-----------|-------|
| <i>k</i> =50  | 1    | 470007281     | 804000000 | 94295129  | 11.73 |
|               | 3    | 1250852012    | 804000000 | 24560434  | 3.05  |
|               | 5    | 1858955242    | 804000000 | 17381581  | 2.16  |
| <i>k</i> =150 | 1    | 470002596     | 404000000 | 47411326  | 11.74 |
|               | 3    | 1250839667    | 404000000 | 12338781  | 3.05  |
|               | 5    | 1858923413    | 404000000 | 8750161   | 2.17  |
| <i>k</i> =250 | 1    | 469997041     | 4000000   | 469325    | 11.73 |
|               | 3    | 1250795983    | 4000000   | 122051    | 3.05  |
|               | 5    | 1858914749    | 4000000   | 86649     | 2.17  |

**Supp Table 3. Bloom filter evaluation for xxhash on real data \***

| k-mer         | Hash | Set bit in BF | Query     | False hit | FPR%  |
|---------------|------|---------------|-----------|-----------|-------|
| <i>k</i> =50  | 1    | 470016553     | 804000000 | 94292232  | 11.73 |
|               | 3    | 1250840753    | 804000000 | 24518667  | 3.05  |
|               | 5    | 1858942822    | 804000000 | 17394611  | 2.16  |
| <i>k</i> =150 | 1    | 469995918     | 404000000 | 47411924  | 11.74 |
|               | 3    | 1250830011    | 404000000 | 12340660  | 3.05  |
|               | 5    | 1858930859    | 404000000 | 8743269   | 2.16  |
| <i>k</i> =250 | 1    | 469986739     | 4000000   | 469547    | 11.74 |
|               | 3    | 1250798629    | 4000000   | 122788    | 3.07  |
|               | 5    | 1858874277    | 4000000   | 86494     | 2.16  |

**Supp Table 4. Bloom filter evaluation for ntHash on real data \***

| k-mer         | Hash | Set bit in BF | Query     | False hit | FPR%  |
|---------------|------|---------------|-----------|-----------|-------|
| <i>k</i> =50  | 1    | 469999521     | 804000000 | 94251857  | 11.72 |
|               | 3    | 1250842928    | 804000000 | 24535428  | 3.05  |
|               | 5    | 1858926469    | 804000000 | 17420006  | 2.17  |
| <i>k</i> =150 | 1    | 469998307     | 404000000 | 47418185  | 11.74 |
|               | 3    | 1250807514    | 404000000 | 12333989  | 3.05  |
|               | 5    | 1858901461    | 404000000 | 8743479   | 2.16  |
| <i>k</i> =250 | 1    | 469989680     | 4000000   | 469293    | 11.74 |
|               | 3    | 1250786386    | 4000000   | 122542    | 3.06  |
|               | 5    | 1858855900    | 4000000   | 86775     | 2.17  |

\*. In all experiments, we first load the Bloom filter with 100 long sequences of length 5,000,000bp and allocating 8 bit/*k*-mer in Bloom filter. Next we query 4,000,000 real reads of length 250bp with *k*-mer of sizes 50, 150 and 250. The theoretical approximate false positive rate for *h*=1, 3, and 5 are 11.75%, 3.06% and 2.17%, respectively.

**Supp Table 5. Bloom filter evaluation for cityhash on simulated data \***

| k-mer         | Hash | Set bit in BF | Query     | False hit | FPR%  |
|---------------|------|---------------|-----------|-----------|-------|
| <i>k</i> =50  | 1    | 470004731     | 804000000 | 94467037  | 11.75 |
|               | 3    | 1250839836    | 804000000 | 24581360  | 3.06  |
|               | 5    | 1858937046    | 804000000 | 17433637  | 2.17  |
| <i>k</i> =150 | 1    | 470001865     | 404000000 | 47475319  | 11.75 |
|               | 3    | 1250810005    | 404000000 | 12352225  | 3.06  |
|               | 5    | 1858911301    | 404000000 | 8757714   | 2.17  |
| <i>k</i> =250 | 1    | 469989444     | 4000000   | 469599    | 11.74 |
|               | 3    | 1250773973    | 4000000   | 122939    | 3.07  |
|               | 5    | 1858866870    | 4000000   | 87331     | 2.18  |

**Supp Table 6. Bloom filter evaluation for murmur on simulated data \***

| k-mer         | Hash | Set bit in BF | Query     | False hit | FPR%  |
|---------------|------|---------------|-----------|-----------|-------|
| <i>k</i> =50  | 1    | 470017505     | 804000000 | 94484767  | 11.75 |
|               | 3    | 1250827988    | 804000000 | 24589864  | 3.06  |
|               | 5    | 1858925731    | 804000000 | 17424248  | 2.17  |
| <i>k</i> =150 | 1    | 469997827     | 404000000 | 47469314  | 11.75 |
|               | 3    | 1250784464    | 404000000 | 12347235  | 3.06  |
|               | 5    | 1858877467    | 404000000 | 8757213   | 2.17  |
| <i>k</i> =250 | 1    | 469992778     | 4000000   | 469332    | 11.73 |
|               | 3    | 1250777246    | 4000000   | 121813    | 3.05  |
|               | 5    | 1858869175    | 4000000   | 86187     | 2.15  |

**Supp Table 7. Bloom filter evaluation for xxhash on simulated data \***

| k-mer         | Hash | Set bit in BF | Query     | False hit | FPR%  |
|---------------|------|---------------|-----------|-----------|-------|
| <i>k</i> =50  | 1    | 470008758     | 804000000 | 94470794  | 11.75 |
|               | 3    | 1250821114    | 804000000 | 24585395  | 3.06  |
|               | 5    | 1858965631    | 804000000 | 17434877  | 2.17  |
| <i>k</i> =150 | 1    | 469991012     | 404000000 | 47464074  | 11.75 |
|               | 3    | 1250815185    | 404000000 | 12350539  | 3.06  |
|               | 5    | 1858920189    | 404000000 | 8751526   | 2.17  |
| <i>k</i> =250 | 1    | 469997137     | 4000000   | 470919    | 11.77 |
|               | 3    | 1250793131    | 4000000   | 122493    | 3.06  |
|               | 5    | 1858893379    | 4000000   | 86618     | 2.17  |

**Supp Table 8. Bloom filter evaluation for ntHash on simulated data \***

| k-mer         | Hash | Set bit in BF | Query     | False hit | FPR%  |
|---------------|------|---------------|-----------|-----------|-------|
| <i>k</i> =50  | 1    | 470001008     | 804000000 | 94473191  | 11.75 |
|               | 3    | 1250822696    | 804000000 | 24594765  | 3.06  |
|               | 5    | 1858911305    | 804000000 | 17428958  | 2.17  |
| <i>k</i> =150 | 1    | 470009333     | 404000000 | 47464574  | 11.75 |
|               | 3    | 1250812436    | 404000000 | 12351716  | 3.06  |
|               | 5    | 1858915330    | 404000000 | 8757143   | 2.17  |
| <i>k</i> =250 | 1    | 469979683     | 4000000   | 469658    | 11.74 |
|               | 3    | 1250795888    | 4000000   | 122625    | 3.07  |
|               | 5    | 1858897893    | 4000000   | 86664     | 2.17  |

\*. In all experiments, we first load the Bloom filter with 100 long sequences of length 5,000,000bp and allocating 8 bit/*k*-mer in Bloom filter. Next we query 4,000,000 simulated reads of length 250bp with *k*-mer of sizes 50, 150 and 250. The theoretical approximate false positive rate for *h*=1, 3, and 5 are 11.75%, 3.06% and 2.17%, respectively.
